# Supplementary material
Source: PubMed Central journal article supplement (PMC8451959)

**a**

Dichotomy 1: "context"

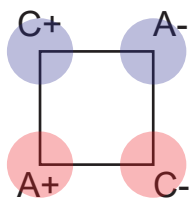

Avg. CCGP: 0.75

Conditions used for training

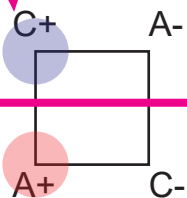

CCGP: 1

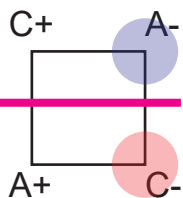

1

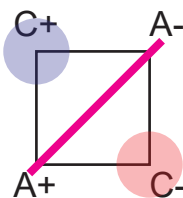

0.5

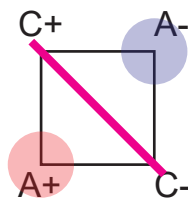

0.5

Dichotomy 2: "value"

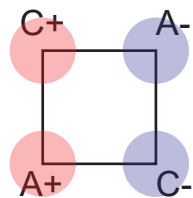

Avg. CCGP: 0.75

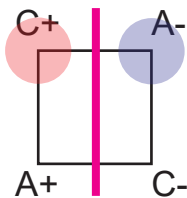

CCGP: 1

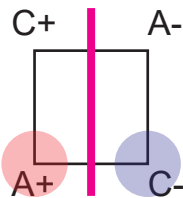

1

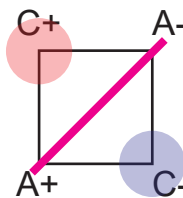

0.5

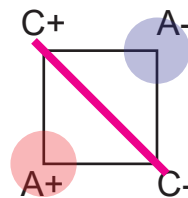

0.5

Dichotomy 3: "stimulus"

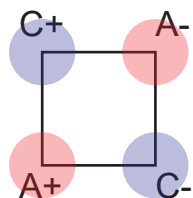

Avg. CCGP: 0

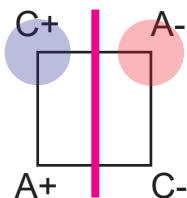

CCGP: 0

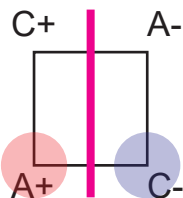

0

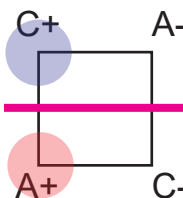

0

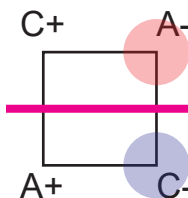

0

**b**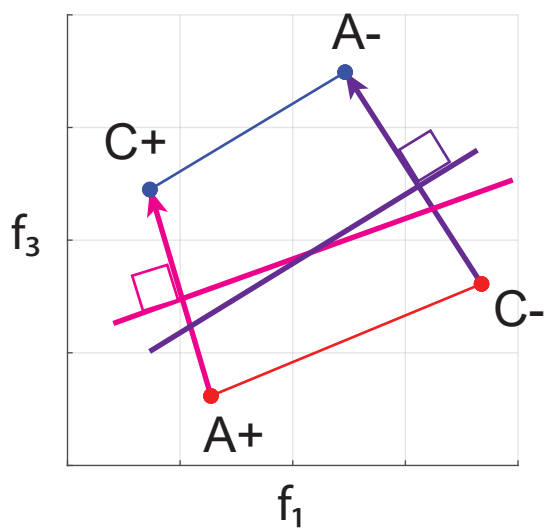**c**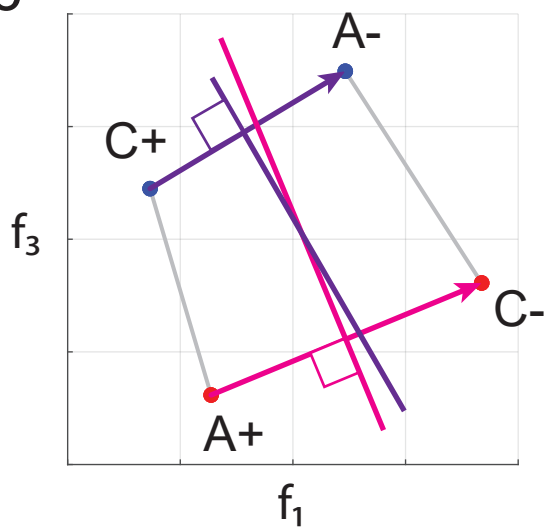

Supplement: NIHMS1629090-supplement-3.pdf [file NIHMS1629090-supplement-3.pdf]
