# Supplementary material
Source: PubMed Central journal article supplement (PMC8451959)

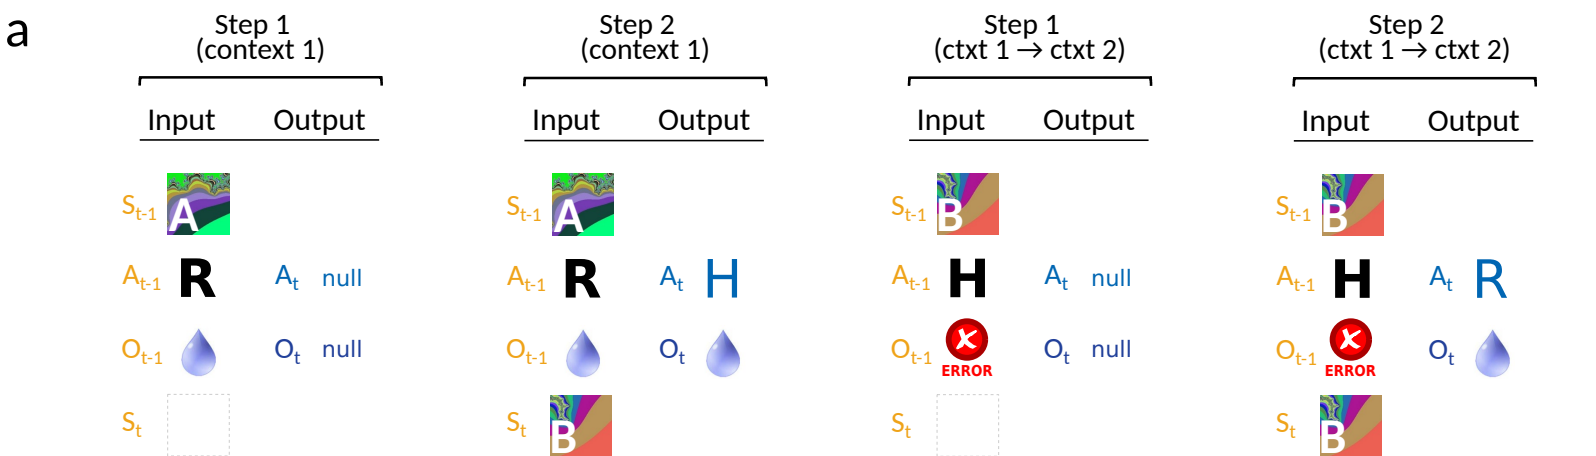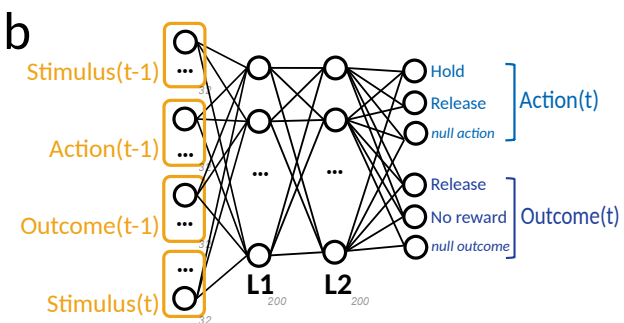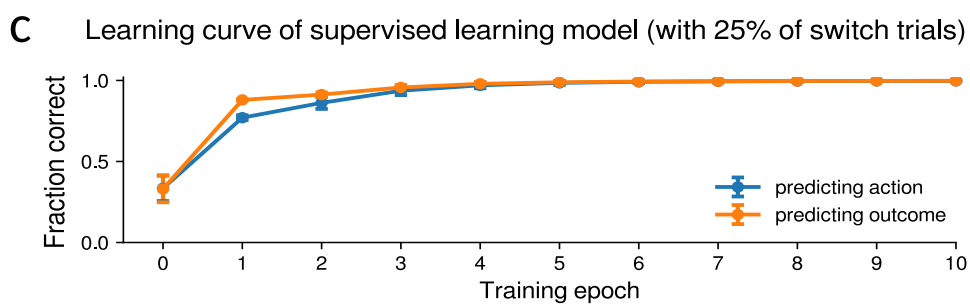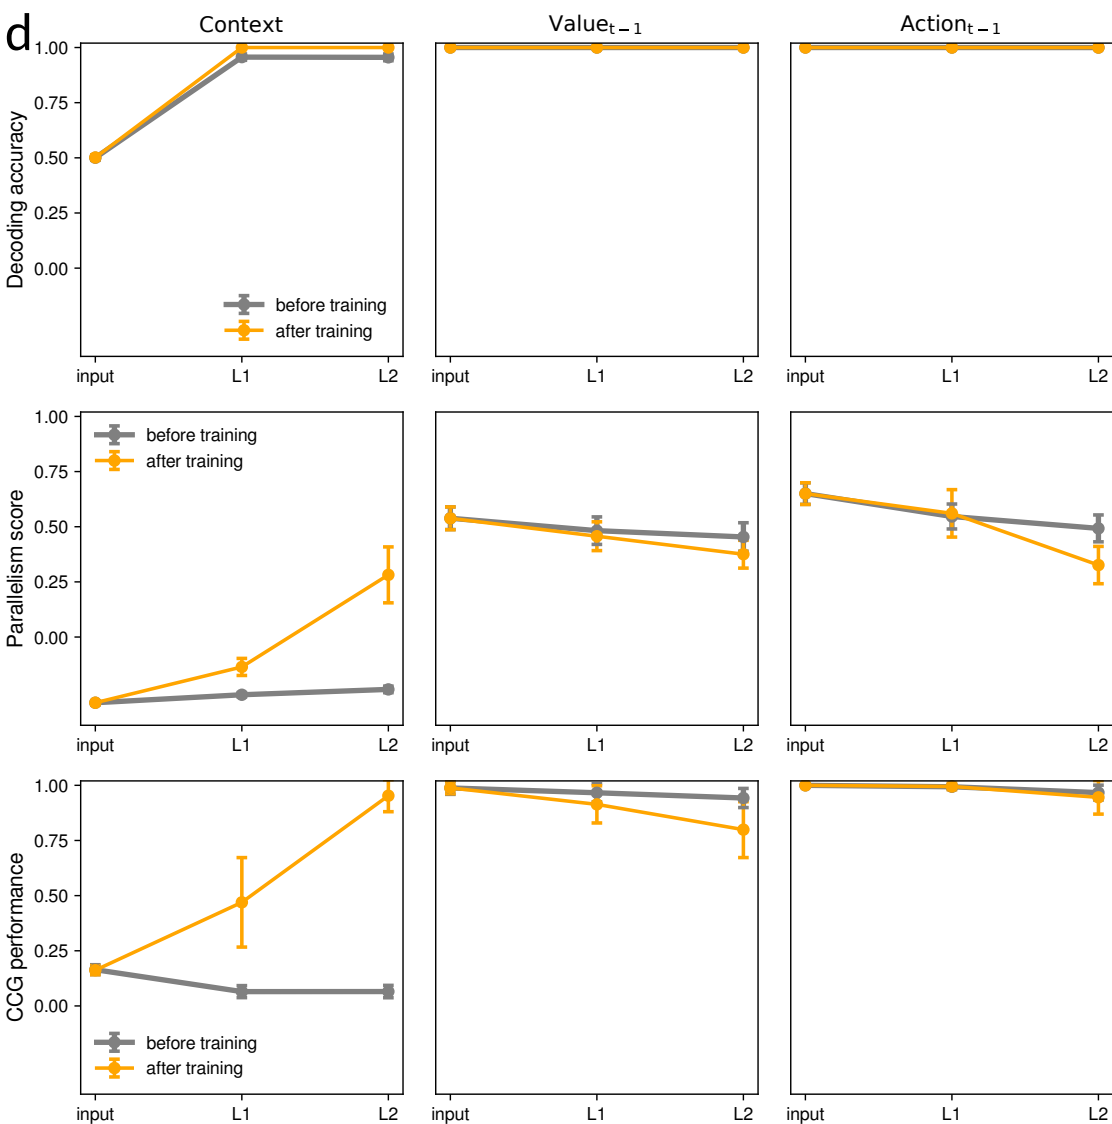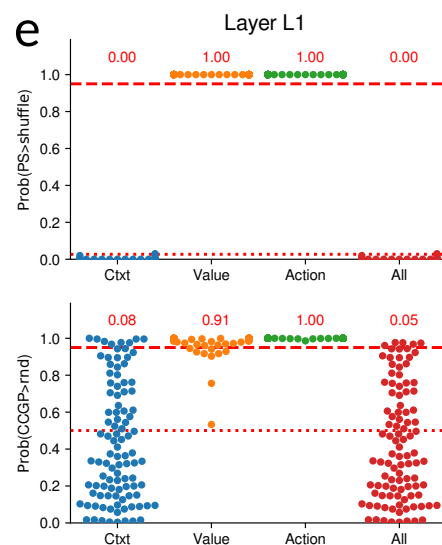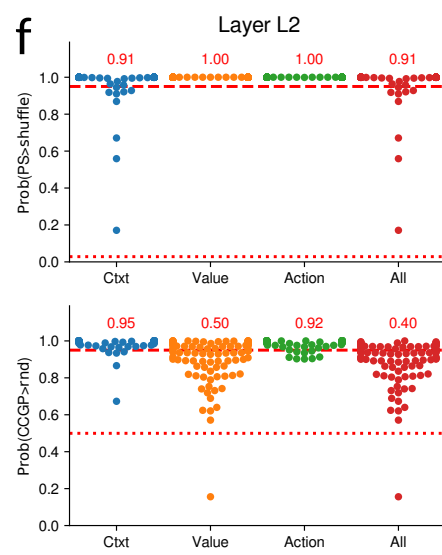

**g** Correlation btw abstract value in L2 and fraction of error trials

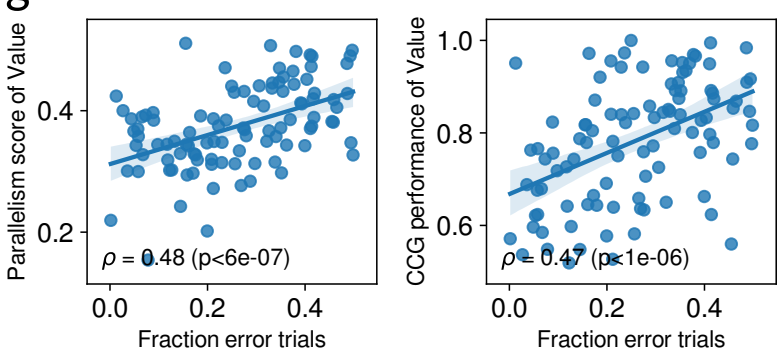

**h** Anti-correlation between abstract context and value in L2

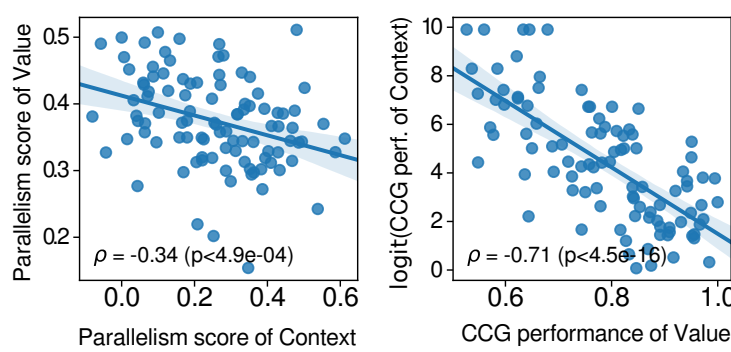

Supplement: NIHMS1629090-supplement-10.pdf [file NIHMS1629090-supplement-10.pdf]
