# Supplementary material
Source: PubMed Central journal article supplement (PMC8451959)
Supplement: NIHMS1629090-supplement-12.pdf [file NIHMS1629090-supplement-12.pdf]

|                 | Cond 1   | Cond 2   | Cond 3   | Cond 4   |
|-----------------|----------|----------|----------|----------|
| <b>Neuron 1</b> | 5        | 9        | 5        | 6        |
| .               | 7        | 8        | 6        | 5        |
| .               | 5        | 6        | 5        | <b>x</b> |
| .               | 8        | 5        | <b>x</b> | <b>x</b> |
|                 | 6        | 7        | <b>x</b> | 7        |
|                 | 6        | <b>x</b> | 7        | 8        |
|                 | 5        | <b>x</b> | 8        | 7        |
|                 | <b>x</b> | 6        | 5        | 6        |
| <b>Neuron 9</b> | <b>x</b> | 5        | 7        | 5        |

number of recorded held-out (test) trials
