# Supplementary material
Source: PubMed Central journal article supplement (PMC8451959)
Supplement: NIHMS1629090-supplement-13.pdf [file NIHMS1629090-supplement-13.pdf]

| Dichotomy: |            |     |             |               | Cross-condition generalization performance: |             |             |             |             |             | Parallelism score: |             |             |             |             |             |
|------------|------------|-----|-------------|---------------|---------------------------------------------|-------------|-------------|-------------|-------------|-------------|--------------------|-------------|-------------|-------------|-------------|-------------|
| #          | Conditions | vs. | Conditions: | Name:         | HPC:                                        |             | DLPFC:      |             | ACC:        |             | HPC:               |             | DLPFC:      |             | ACC:        |             |
|            |            |     |             |               | Early:                                      | Late:       | Early:      | Late:       | Early:      | Late:       | Early:             | Late:       | Early:      | Late:       | Early:      | Late:       |
| 1          | 1,2,3,4    | vs. | 5,6,7,8     | Context       | <b>0.96</b>                                 | <b>0.76</b> | <b>0.74</b> | 0.44        | <b>0.81</b> | <b>0.65</b> | <b>0.39</b>        | <b>0.24</b> | <b>0.30</b> | <b>0.13</b> | <b>0.36</b> | <b>0.22</b> |
| 2          | 1,2,3,5    | vs. | 4,6,7,8     | N/A           | <b>0.65</b>                                 | <b>0.73</b> | 0.58        | 0.63        | <b>0.63</b> | <b>0.71</b> | <b>0.14</b>        | <b>0.24</b> | <b>0.13</b> | <b>0.25</b> | <b>0.15</b> | <b>0.27</b> |
| 3          | 1,2,3,6    | vs. | 4,5,7,8     | N/A           | 0.49                                        | 0.59        | 0.55        | 0.61        | 0.50        | 0.54        | <b>0.06</b>        | <b>0.14</b> | <b>0.11</b> | <b>0.14</b> | <b>0.13</b> | <b>0.12</b> |
| 4          | 1,2,3,7    | vs. | 4,5,6,8     | N/A           | 0.55                                        | 0.49        | 0.53        | 0.49        | 0.52        | 0.48        | <b>0.09</b>        | <b>0.12</b> | <b>0.15</b> | <b>0.10</b> | <b>0.15</b> | <b>0.09</b> |
| 5          | 1,2,3,8    | vs. | 4,5,6,7     | N/A           | 0.47                                        | 0.36        | 0.35        | 0.25        | 0.37        | 0.37        | 0.04               | 0.00        | -0.01       | -0.01       | 0.00        | 0.04        |
| 6          | 1,2,4,5    | vs. | 3,6,7,8     | N/A           | 0.56                                        | 0.46        | 0.50        | 0.50        | 0.46        | 0.49        | <b>0.11</b>        | <b>0.11</b> | <b>0.08</b> | <b>0.12</b> | <b>0.08</b> | <b>0.10</b> |
| 7          | 1,2,4,6    | vs. | 3,5,7,8     | N/A           | <b>0.60</b>                                 | 0.57        | 0.55        | 0.60        | <b>0.61</b> | 0.51        | <b>0.11</b>        | <b>0.11</b> | <b>0.10</b> | <b>0.17</b> | <b>0.16</b> | <b>0.10</b> |
| 8          | 1,2,4,7    | vs. | 3,5,6,8     | N/A           | 0.49                                        | 0.28        | 0.35        | 0.23        | 0.33        | 0.28        | 0.04               | -0.01       | -0.01       | -0.02       | -0.02       | -0.03       |
| 9          | 1,2,4,8    | vs. | 3,5,6,7     | N/A           | 0.50                                        | 0.50        | 0.43        | 0.46        | 0.46        | 0.59        | <b>0.07</b>        | <b>0.08</b> | 0.05        | <b>0.08</b> | <b>0.10</b> | <b>0.16</b> |
| 10         | 1,2,5,6    | vs. | 3,4,7,8     | Value         | <b>0.79</b>                                 | <b>0.95</b> | <b>0.88</b> | <b>0.99</b> | <b>0.94</b> | <b>1.00</b> | <b>0.23</b>        | <b>0.36</b> | <b>0.27</b> | <b>0.46</b> | <b>0.41</b> | <b>0.54</b> |
| 11         | 1,2,5,7    | vs. | 3,4,6,8     | N/A           | 0.49                                        | 0.57        | 0.44        | 0.54        | 0.46        | 0.54        | <b>0.06</b>        | <b>0.19</b> | 0.01        | <b>0.21</b> | 0.06        | <b>0.22</b> |
| 12         | 1,2,5,8    | vs. | 3,4,6,7     | Stimuli AB CD | 0.46                                        | 0.51        | 0.44        | 0.53        | 0.44        | 0.59        | <b>0.05</b>        | <b>0.07</b> | 0.01        | <b>0.11</b> | 0.01        | <b>0.15</b> |
| 13         | 1,2,6,7    | vs. | 3,4,5,8     | N/A           | 0.46                                        | 0.50        | 0.54        | 0.49        | 0.51        | 0.51        | 0.03               | <b>0.06</b> | <b>0.08</b> | 0.02        | 0.05        | 0.05        |
| 14         | 1,2,6,8    | vs. | 3,4,5,7     | N/A           | 0.37                                        | 0.51        | 0.48        | 0.52        | 0.48        | 0.55        | -0.02              | <b>0.06</b> | 0.06        | <b>0.10</b> | <b>0.12</b> | <b>0.14</b> |
| 15         | 1,2,7,8    | vs. | 3,4,5,6     | N/A           | 0.28                                        | 0.15        | 0.24        | 0.11        | 0.21        | 0.21        | -0.10              | -0.11       | -0.11       | -0.11       | -0.13       | -0.07       |
| 16         | 1,3,4,5    | vs. | 2,6,7,8     | N/A           | 0.56                                        | 0.52        | 0.59        | 0.47        | 0.56        | 0.47        | <b>0.09</b>        | <b>0.12</b> | <b>0.15</b> | <b>0.08</b> | <b>0.15</b> | <b>0.10</b> |
| 17         | 1,3,4,6    | vs. | 2,5,7,8     | N/A           | 0.51                                        | 0.40        | 0.36        | 0.30        | 0.39        | 0.27        | 0.04               | 0.04        | -0.02       | 0.04        | 0.00        | -0.01       |
| 18         | 1,3,4,7    | vs. | 2,5,6,8     | N/A           | 0.58                                        | <b>0.62</b> | <b>0.65</b> | 0.62        | <b>0.61</b> | 0.55        | <b>0.12</b>        | <b>0.13</b> | <b>0.21</b> | <b>0.13</b> | <b>0.19</b> | <b>0.16</b> |
| 19         | 1,3,4,8    | vs. | 2,5,6,7     | N/A           | <b>0.61</b>                                 | <b>0.61</b> | 0.53        | 0.59        | 0.51        | 0.58        | <b>0.13</b>        | <b>0.13</b> | <b>0.14</b> | <b>0.14</b> | <b>0.15</b> | <b>0.17</b> |
| 20         | 1,3,5,6    | vs. | 2,4,7,8     | N/A           | 0.45                                        | 0.51        | 0.47        | 0.52        | 0.50        | 0.53        | 0.02               | <b>0.17</b> | 0.04        | <b>0.17</b> | <b>0.09</b> | <b>0.23</b> |
| 21         | 1,3,5,7    | vs. | 2,4,6,8     | Action        | 0.43                                        | <b>0.91</b> | <b>0.75</b> | <b>1.00</b> | <b>0.90</b> | <b>0.96</b> | 0.03               | <b>0.28</b> | <b>0.20</b> | <b>0.49</b> | <b>0.35</b> | <b>0.38</b> |
| 22         | 1,3,5,8    | vs. | 2,4,6,7     | N/A           | 0.43                                        | 0.43        | 0.50        | 0.58        | 0.50        | 0.44        | 0.02               | 0.00        | 0.04        | <b>0.11</b> | 0.04        | 0.05        |
| 23         | 1,3,6,7    | vs. | 2,4,5,8     | N/A           | 0.35                                        | 0.42        | 0.45        | 0.50        | 0.44        | 0.45        | -0.02              | 0.01        | <b>0.06</b> | 0.03        | 0.04        | 0.02        |
| 24         | 1,3,6,8    | vs. | 2,4,5,7     | Stimuli AC BD | 0.27                                        | 0.20        | 0.19        | 0.26        | 0.17        | 0.17        | -0.07              | -0.08       | -0.13       | 0.00        | -0.15       | -0.08       |
| 25         | 1,3,7,8    | vs. | 2,4,5,6     | N/A           | 0.45                                        | 0.40        | 0.53        | 0.54        | 0.50        | 0.48        | 0.04               | -0.03       | <b>0.09</b> | <b>0.09</b> | <b>0.11</b> | 0.03        |
| 26         | 1,4,5,6    | vs. | 2,3,7,8     | N/A           | 0.51                                        | 0.40        | 0.45        | 0.44        | 0.50        | 0.44        | <b>0.06</b>        | 0.01        | 0.02        | 0.03        | <b>0.06</b> | 0.00        |
| 27         | 1,4,5,7    | vs. | 2,3,6,8     | N/A           | 0.32                                        | 0.46        | 0.48        | 0.51        | 0.41        | 0.42        | -0.04              | 0.04        | 0.03        | <b>0.06</b> | -0.01       | 0.03        |
| 28         | 1,4,5,8    | vs. | 2,3,6,7     | N/A           | 0.45                                        | 0.51        | <b>0.65</b> | 0.61        | 0.49        | 0.48        | 0.04               | -0.02       | <b>0.08</b> | -0.06       | -0.04       | -0.06       |
| 29         | 1,4,6,7    | vs. | 2,3,5,8     | N/A           | 0.39                                        | 0.26        | 0.30        | 0.21        | 0.30        | 0.20        | 0.00               | -0.06       | -0.06       | -0.02       | -0.08       | -0.07       |
| 30         | 1,4,6,8    | vs. | 2,3,5,7     | N/A           | 0.43                                        | 0.53        | 0.34        | 0.54        | 0.43        | 0.48        | 0.03               | <b>0.06</b> | -0.03       | <b>0.17</b> | 0.01        | <b>0.07</b> |
| 31         | 1,4,7,8    | vs. | 2,3,5,6     | Stimuli AD BC | 0.44                                        | 0.45        | 0.51        | 0.49        | 0.44        | 0.49        | 0.02               | 0.04        | 0.05        | <b>0.10</b> | 0.01        | <b>0.07</b> |
| 32         | 1,5,6,7    | vs. | 2,3,4,8     | N/A           | <b>0.60</b>                                 | <b>0.67</b> | <b>0.63</b> | 0.55        | <b>0.69</b> | <b>0.70</b> | <b>0.13</b>        | <b>0.18</b> | <b>0.17</b> | <b>0.17</b> | <b>0.22</b> | <b>0.26</b> |
| 33         | 1,5,6,8    | vs. | 2,3,4,7     | N/A           | <b>0.59</b>                                 | 0.51        | 0.52        | 0.60        | 0.54        | 0.57        | <b>0.13</b>        | <b>0.09</b> | <b>0.15</b> | <b>0.13</b> | <b>0.19</b> | <b>0.17</b> |
| 34         | 1,5,7,8    | vs. | 2,3,4,6     | N/A           | 0.51                                        | 0.47        | 0.57        | 0.55        | 0.50        | 0.50        | <b>0.07</b>        | <b>0.07</b> | <b>0.12</b> | <b>0.14</b> | <b>0.14</b> | <b>0.11</b> |
| 35         | 1,6,7,8    | vs. | 2,3,4,5     | N/A           | 0.51                                        | 0.30        | 0.42        | 0.24        | 0.39        | 0.31        | <b>0.07</b>        | -0.03       | 0.05        | 0.00        | 0.02        | 0.01        |
