# Supplementary material
Source: PubMed Central journal article supplement (PMC8451959)

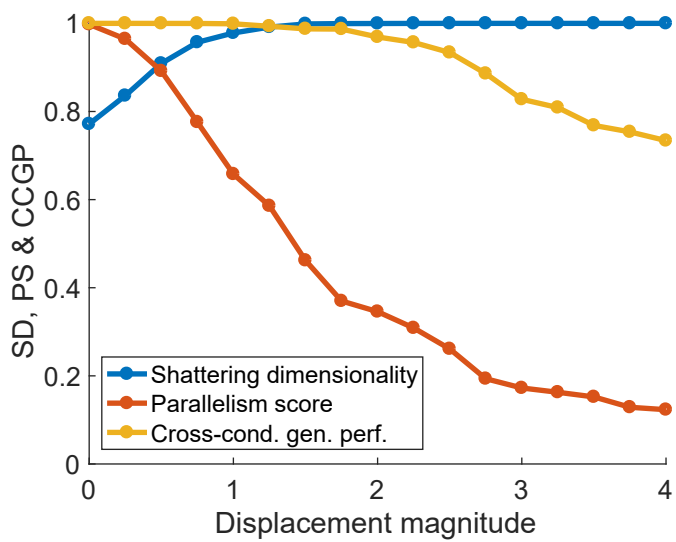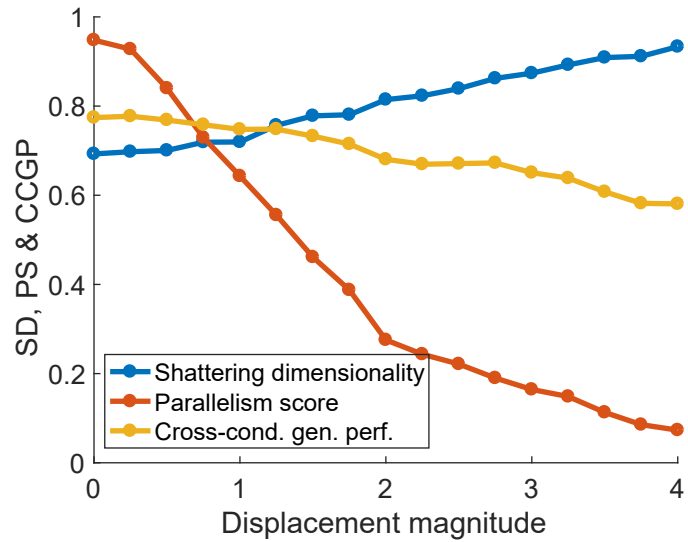

Supplement: NIHMS1629090-supplement-4.pdf [file NIHMS1629090-supplement-4.pdf]

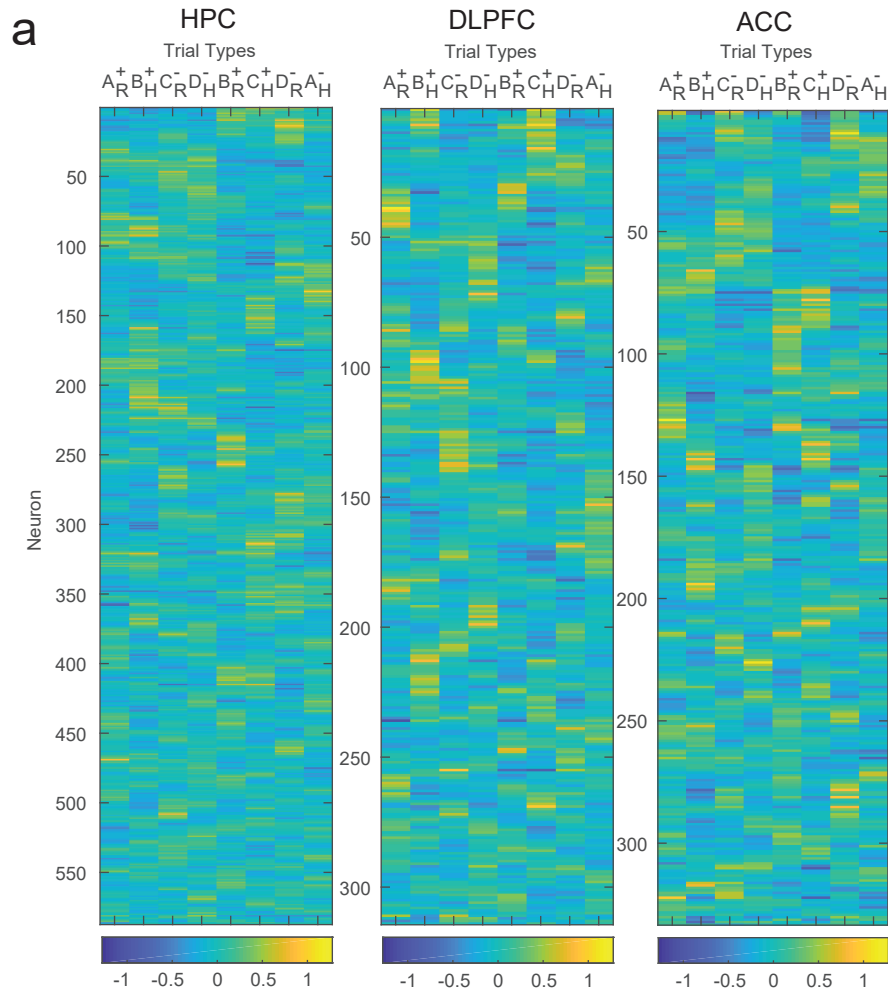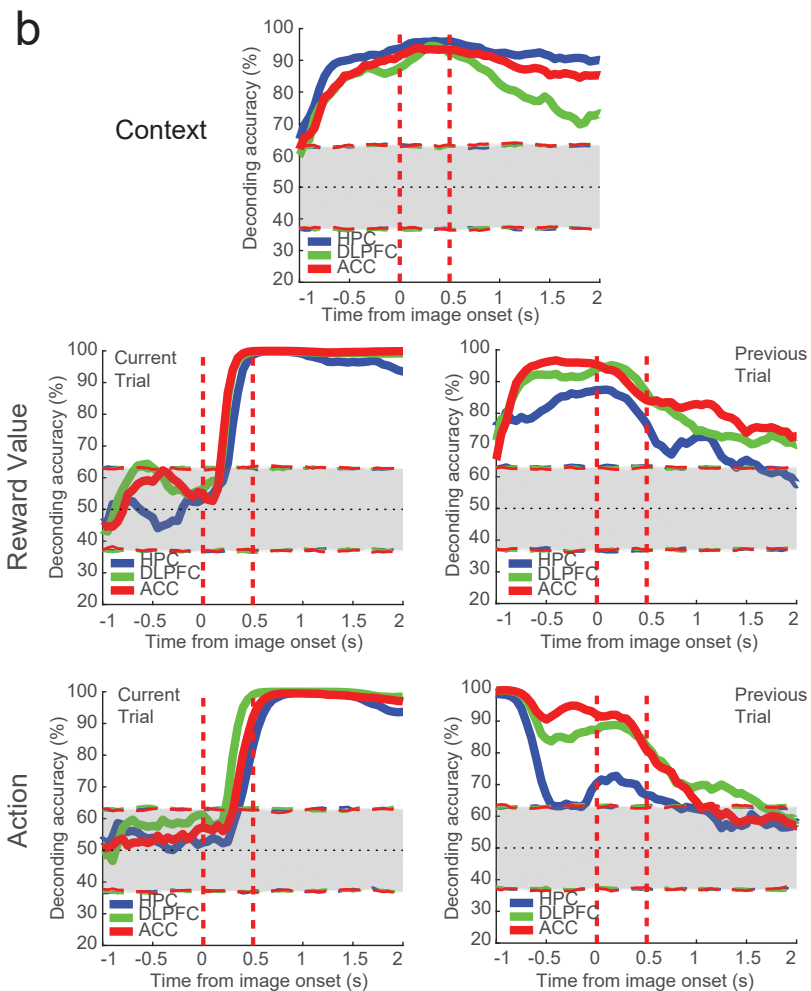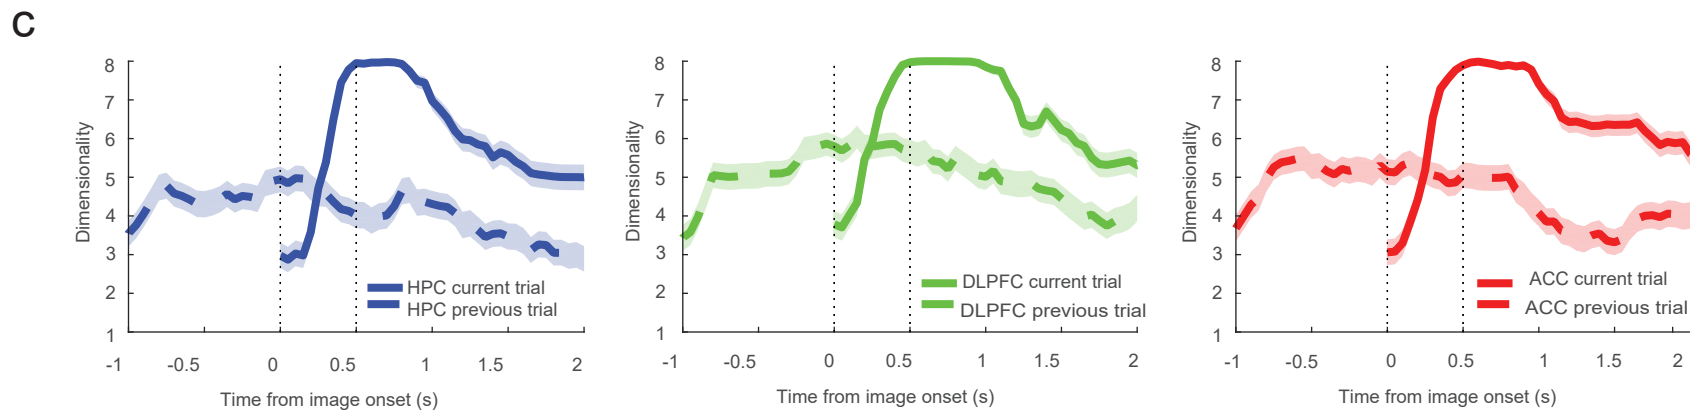

Supplement: NIHMS1629090-supplement-5.pdf [file NIHMS1629090-supplement-5.pdf]

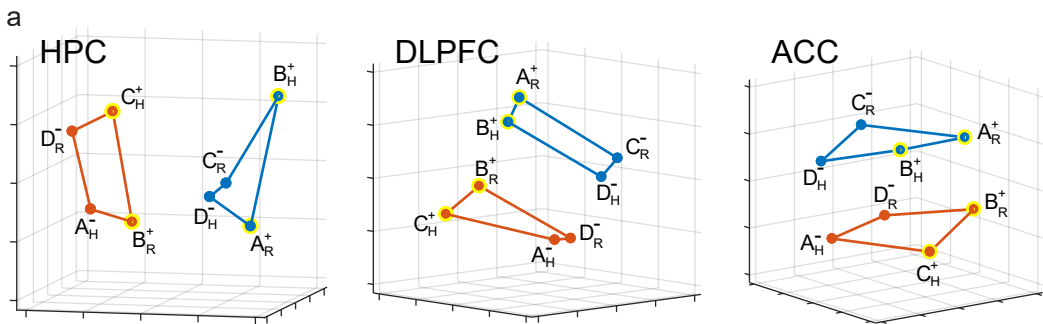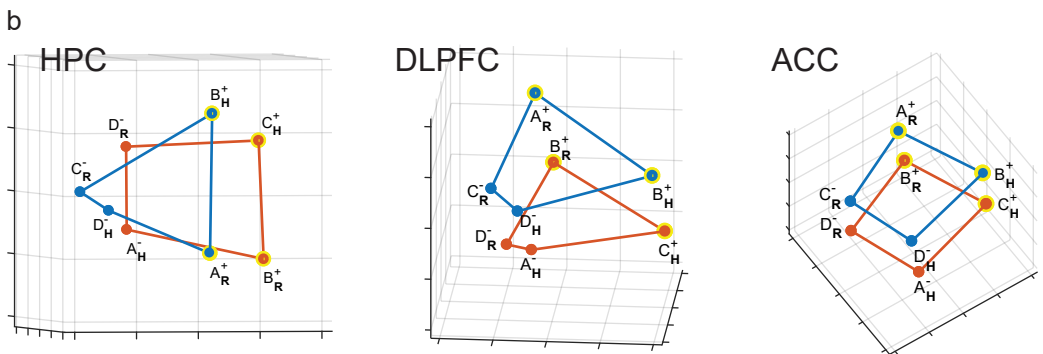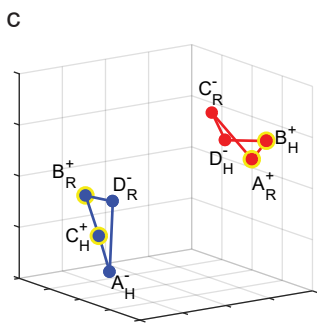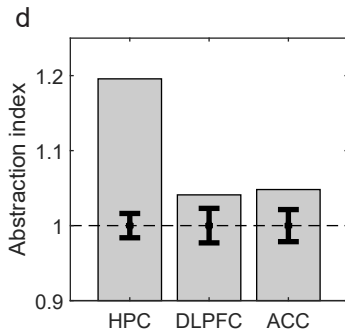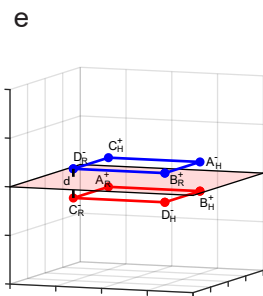

Supplement: NIHMS1629090-supplement-6.pdf [file NIHMS1629090-supplement-6.pdf]

Monkey F

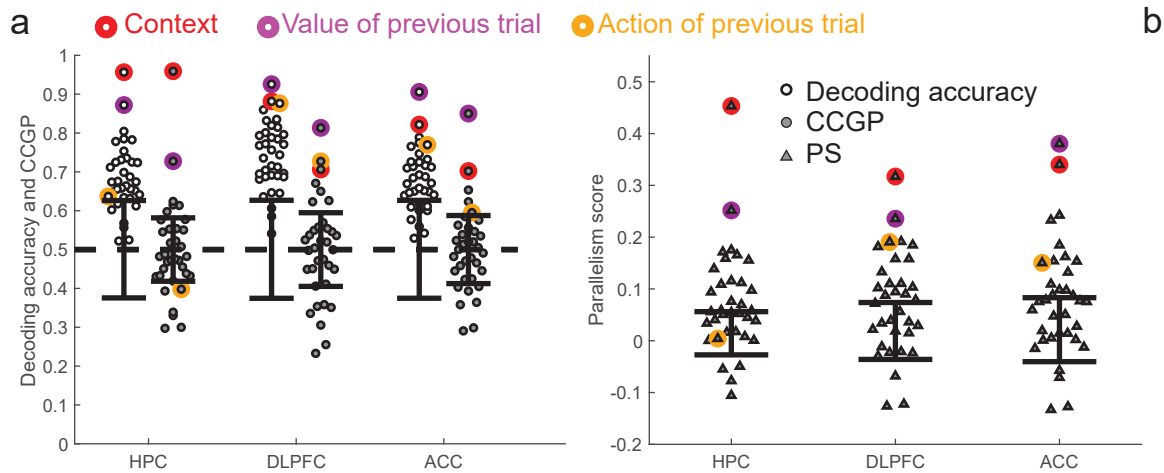

**b**

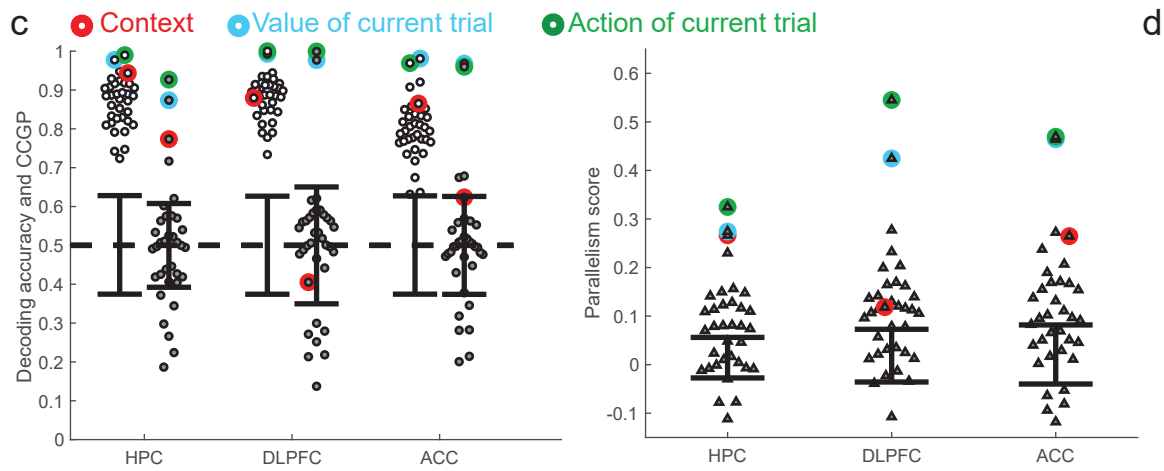

**d**

Monkey R

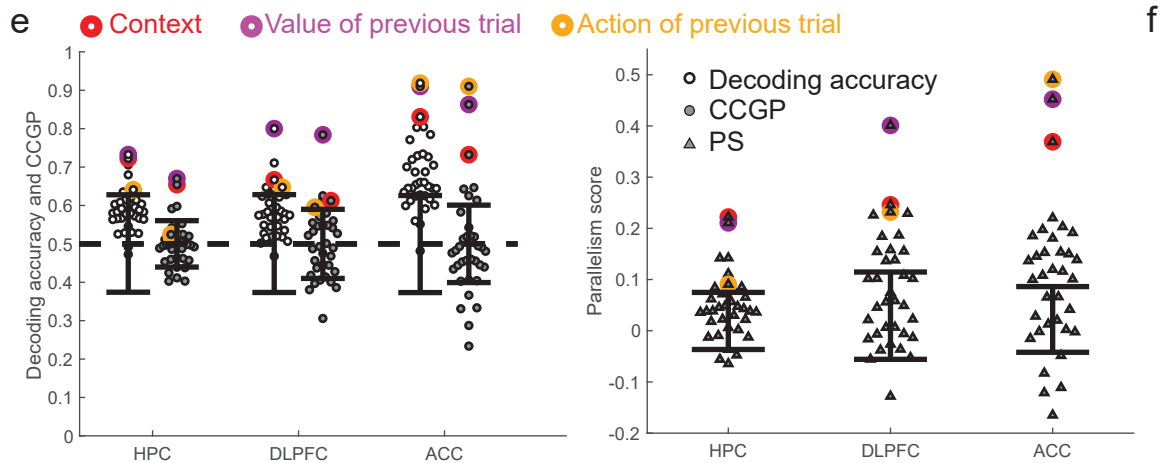

**f**

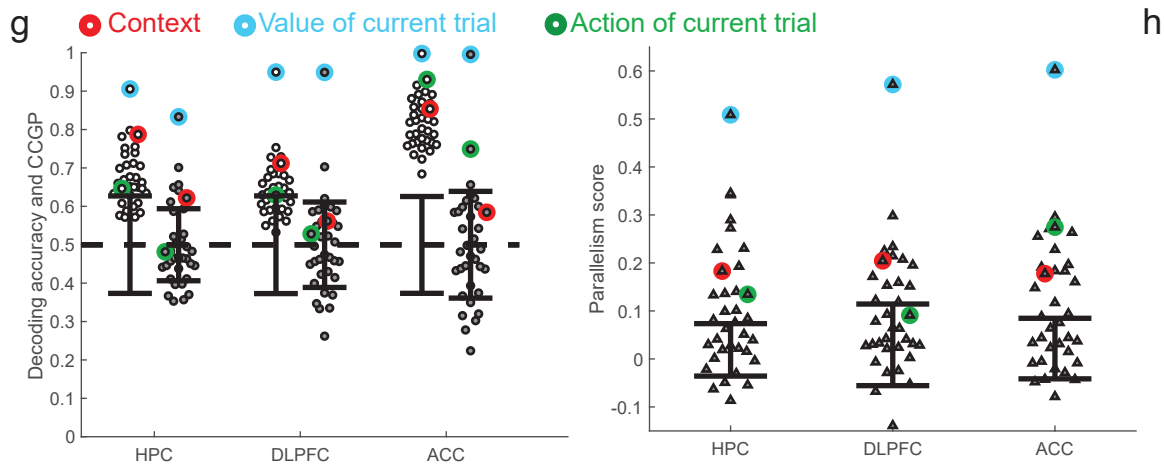

**h**

Supplement: NIHMS1629090-supplement-7.pdf [file NIHMS1629090-supplement-7.pdf]

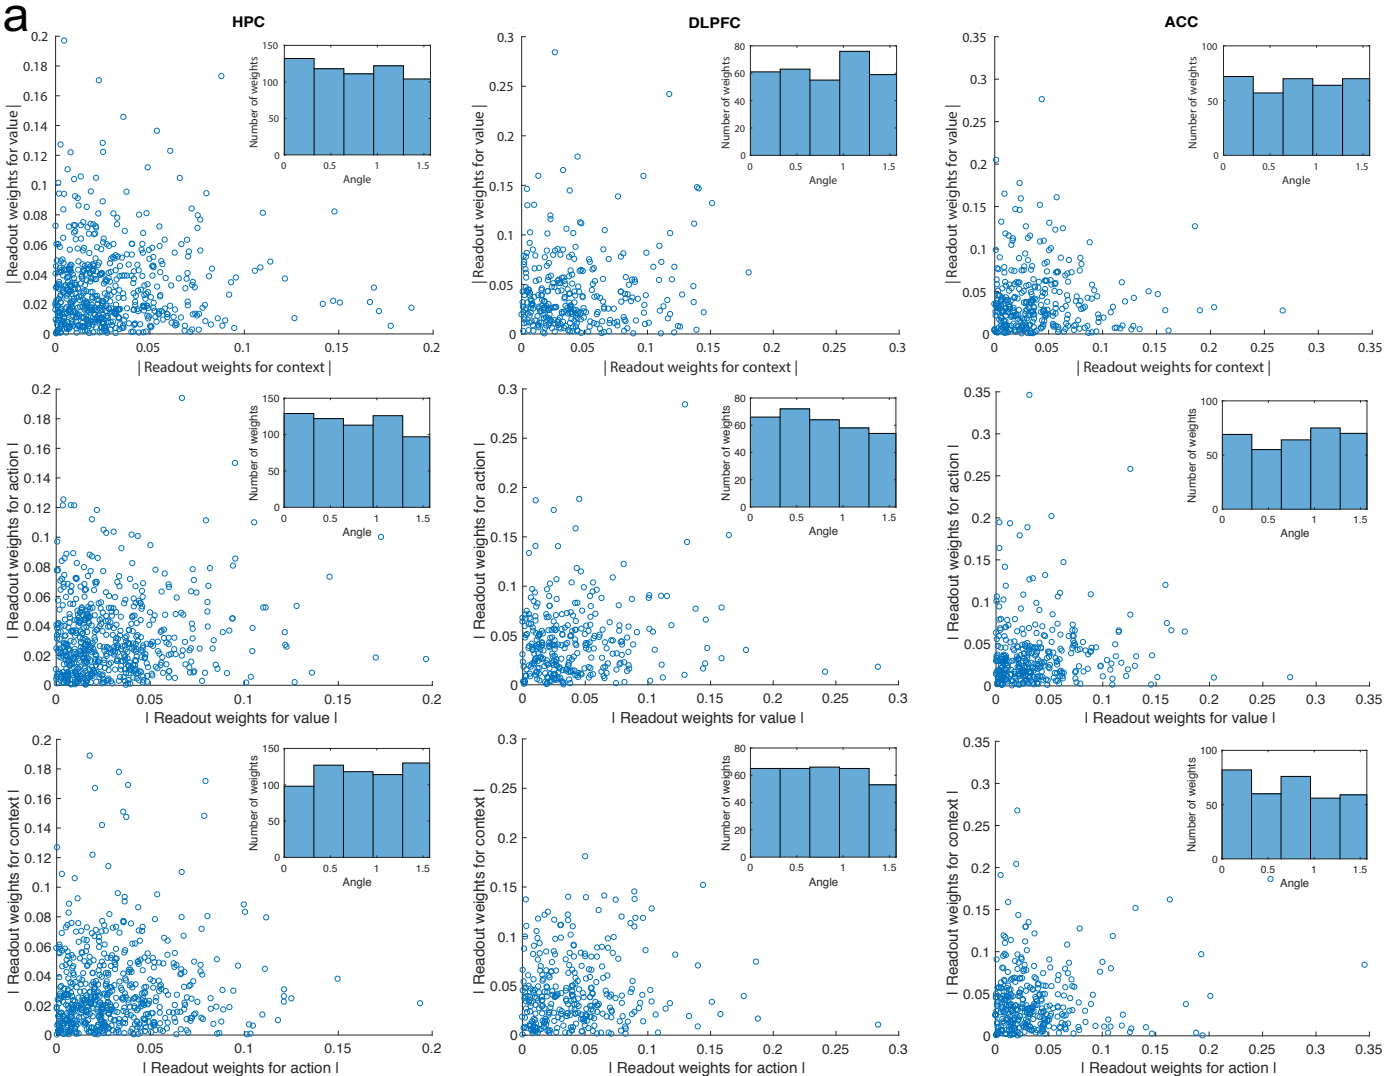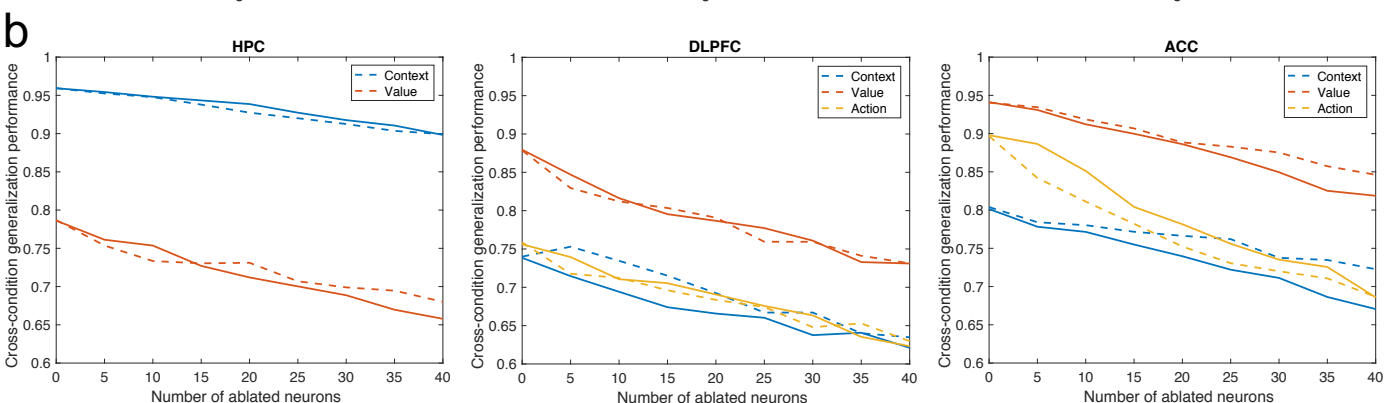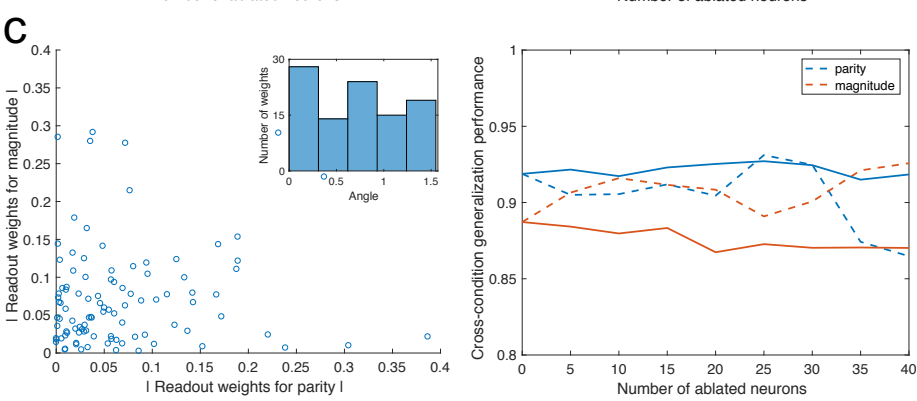

Supplement: NIHMS1629090-supplement-8.pdf [file NIHMS1629090-supplement-8.pdf]

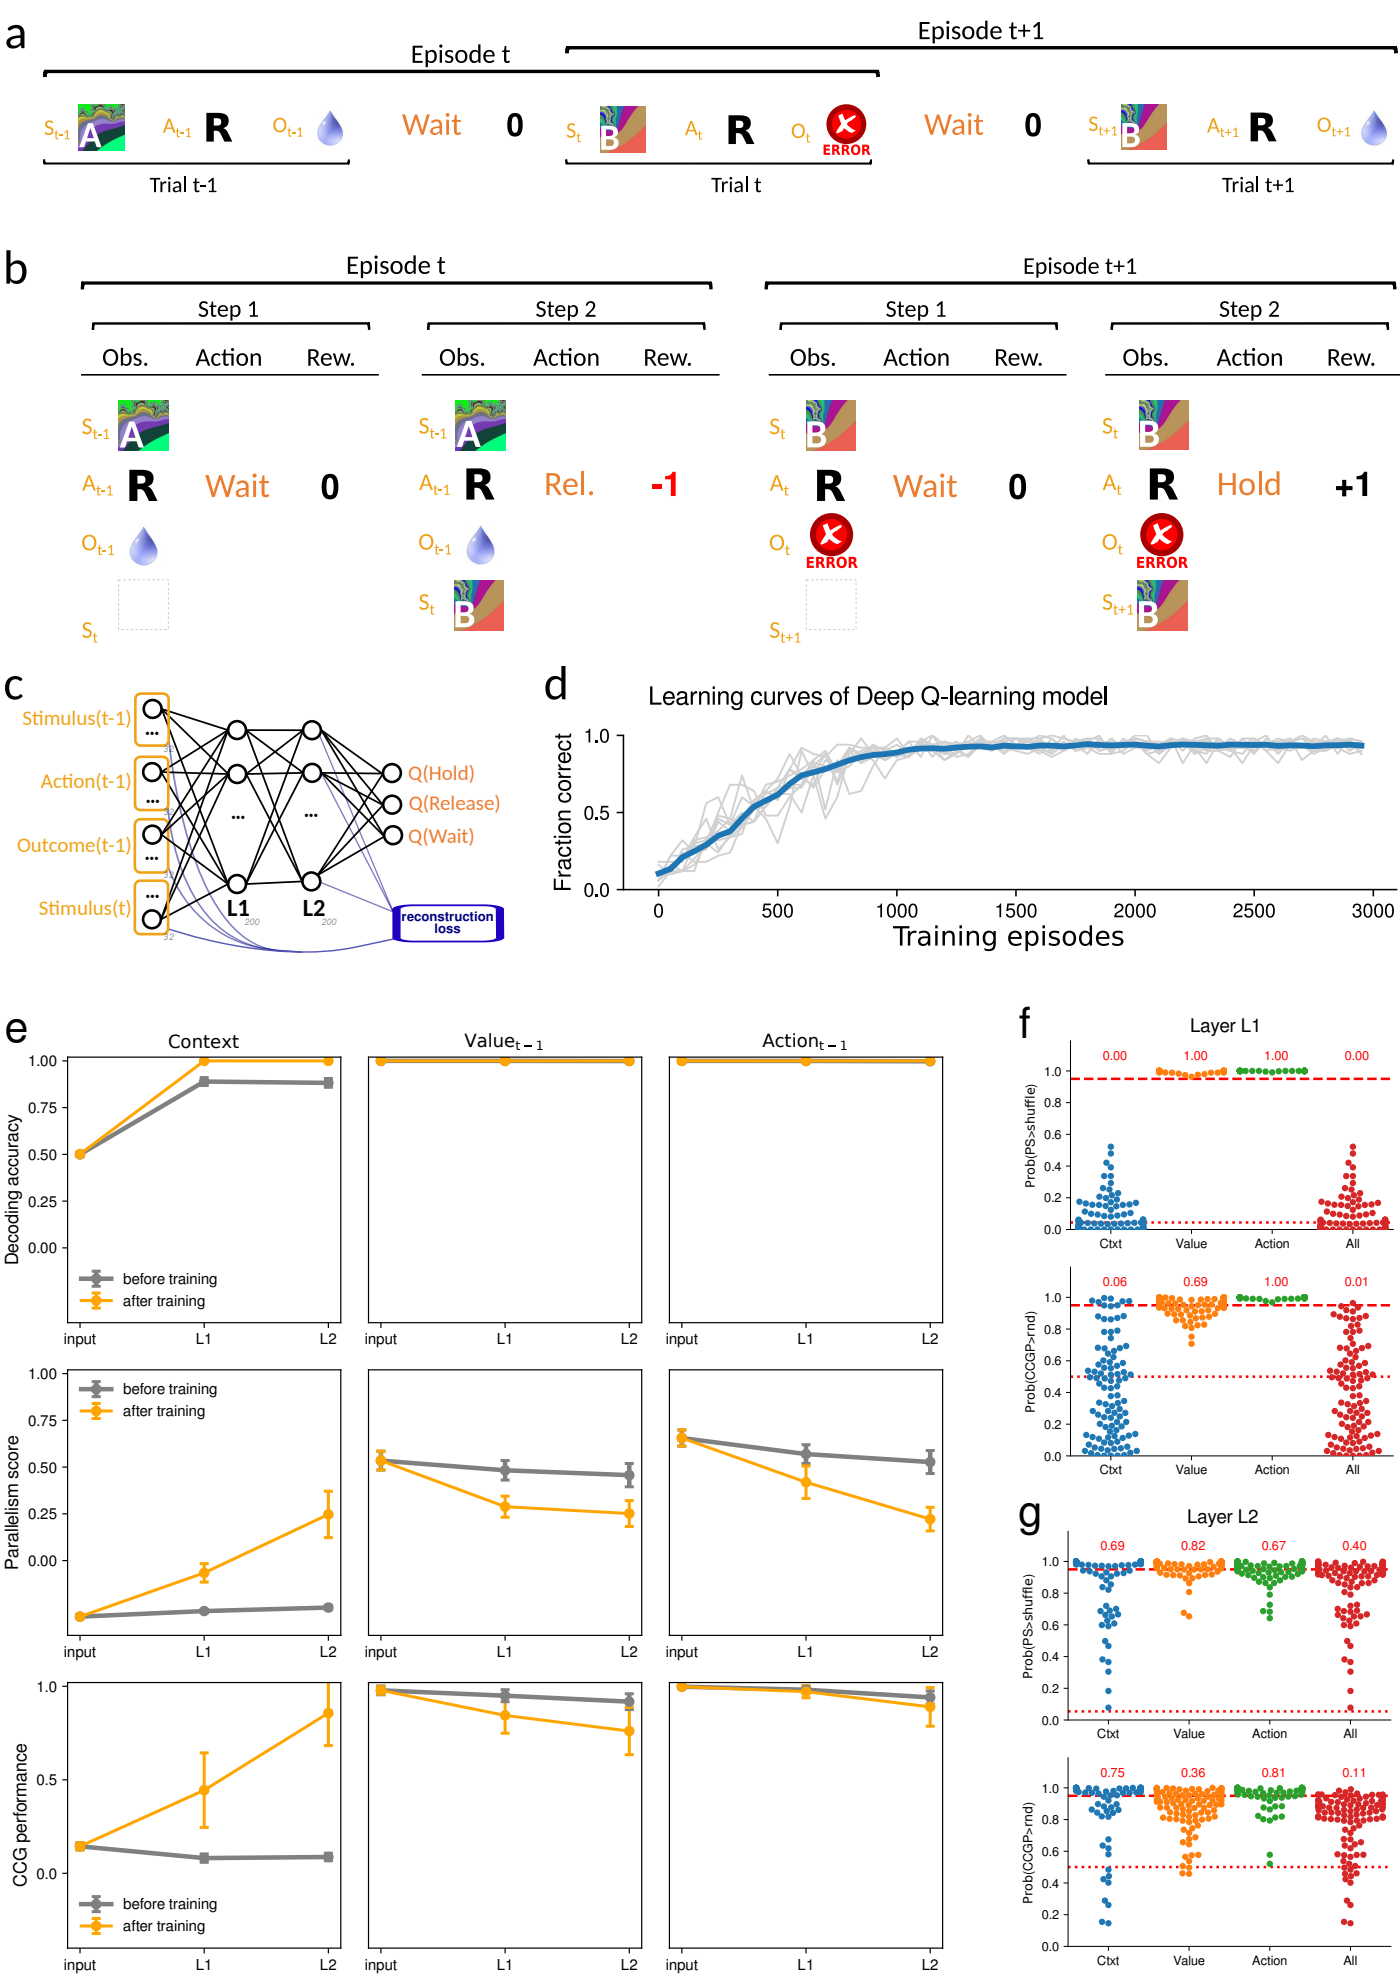

Supplement: NIHMS1629090-supplement-9.pdf [file NIHMS1629090-supplement-9.pdf]
